# Supplementary material for: Optimisation of PLS Calibrations for Filtered and Untreated Samples towards In-Line Monitoring of Phenolic Extraction during Red-Wine Fermentations
Source: MDPI journal article supplement (doi:10.3390/fermentation8050231), 2022-05-17
Supplement: s1 [file s1]

Table S1a Summary of Pre-processing methods and wavenumber regions selected for ATR-FT-MIR

| <i>Component</i>          | <i>Sample Treatment</i> | <i>Rank</i> | <i>Pre-processing Method</i>                | <i>Wavenumber Regions</i>                 |
|---------------------------|-------------------------|-------------|---------------------------------------------|-------------------------------------------|
| Anthocyanins (mg/L)       | Filtered                | 7           | Log10                                       | (1100-2500) (2700-4000)                   |
| Anthocyanins (mg/L)       | Untreated               | 8           | Autoscale                                   | 4000 - 400                                |
| Colour Density            | Filtered                | 6           | Baseline (Automatic Whittaker Filter)       | 4000 - 400                                |
| Colour Density            | Untreated               | 4           | Glog                                        | 4000 - 400                                |
| Polymeric Pigments (mg/L) | Filtered                | 8           | Multiway Scaling                            | (1500 - 1700) (2500 - 3500)               |
| Polymeric Pigments (mg/L) | Untreated               | 7           | Autoscale                                   | (1400 - 1500) (2500 - 2600) (3100 - 3500) |
| Tannins (mg/L)            | Filtered                | 5           | Normalising                                 | 4000 - 400                                |
| Tannins (mg/L)            | Untreated               | 3           | GLog                                        | 4000 - 400                                |
| Total polyphenol index    | Filtered                | 9           | Autoscale                                   | (1000 - 1500) (2700 - 3000) (3500 - 3700) |
| Total polyphenol index    | Untreated               | 8           | Baseline (Automatic Weighted Least Squares) | (1400 - 2000) (2700 - 3000)               |

Table S1b Summary of Pre-processing methods and wavenumber regions selected for T-FT-NIR

| <i>Component</i>          | <i>Sample Treatment</i> | <i>Rank</i> | <i>Pre-processing Method</i>                | <i>Wavenumber Regions</i>                   |
|---------------------------|-------------------------|-------------|---------------------------------------------|---------------------------------------------|
| Anthocyanins (mg/L)       | Filtered                | 4           | Baseline (Automatic Weighted Least Squares) | (5800-6000) (7000 - 7050)                   |
| Anthocyanins (mg/L)       | Untreated               | 4           | Baseline (Automatic Weighted Least Squares) | 5800 -6000                                  |
| Colour Density            | Filtered                | 5           | Baseline (Automatic Whittaker Filter)       | (5800-6200) (7000 -8000)                    |
| Colour Density            | Untreated               | 5           | Median Centering                            | (5800 - 6200) (8000 - 8400) (10000 - 11400) |
| Polymeric Pigments (mg/L) | Filtered                | 3           | Min-Max Scaling                             | (5800 -6200)                                |
| Polymeric Pigments (mg/L) | Untreated               | 4           | Median Centering                            | (5800 - 6200) (8000 - 8400)                 |
| Tannins (mg/L)            | Filtered                | 2           | Baseline (Automatic Weighted Least Squares) | (6000 -6200) (8500 - 9500) (10000 -10200)   |
| Tannins (mg/L)            | Untreated               | 7           | MSC                                         | (5800 -6200)                                |
| Total polyphenol index    | Filtered                | 4           | Baseline (Automatic Weighted Least Squares) | (5800 - 6200) (7000 -8000)                  |
| Total polyphenol index    | Untreated               | 3           | Baseline (Automatic Weighted Least Squares) | 4000 - 11400                                |

Table S1c Summary of Pre-processing methods and wavenumber regions selected for DR-FT-NIR

| <i>Component</i>          | <i>Sample Treatment</i> | <i>Rank</i> | <i>Pre-processing Method</i>          | <i>Wavenumber Regions</i> |
|---------------------------|-------------------------|-------------|---------------------------------------|---------------------------|
| Anthocyanins (mg/L)       | Filtered                | 9           | Multiway Scale                        | 4100 - 12000              |
| Anthocyanins (mg/L)       | Turbid                  | 8           | Multiway Scale                        | 4000-12000                |
| Colour Density            | Filtered                | 7           | Baseline (Automatic Whittaker Filter) | 4100 - 12000              |
| Colour Density            | Turbid                  | 7           | Multiway Scale                        | 4000-12000                |
| Polymeric Pigments (mg/L) | Filtered                | 7           | Autoscale                             | 4000-12000                |
| Polymeric Pigments (mg/L) | Turbid                  | 3           | 2nd Derivative                        | 4000-12000                |
| Tannins (mg/L)            | Filtered                | 6           | Detrend                               | 4000-12000                |
| Tannins (mg/L)            | Turbid                  | 6           | Detrend                               | 4000-12000                |
| Total polyphenol index    | Filtered                | 8           | Multiway Scale                        | 4100 - 12000              |
| Total polyphenol index    | Turbid                  | 7           | Min-Max Scaling                       | 4100 - 12000              |
